# Supplementary material for: Detection of SARS-CoV-2 infection by microRNA profiling of the upper respiratory tract
Source: Research Square preprint supplement (doi:10.21203/rs.3.rs-907655/v1), 2021-09-28
Supplement: Supplementary file 1 [file 6908b1d9ac48c9c884d5381d.xlsx]

## Sheet: Table 1
Patient	DOC	SPECIMEN TYPE	Test result	Condition	SARS-CoV-2 CT Replicate 1	SARS-CoV-2 CT Replicate 2
NS001	2020-08-06	SWAB	SARS-CoV-2 Positive	COVID-19	28.26	28.3
NS002	2020-08-09	SWAB	SARS-CoV-2 Positive	COVID-19	29.11	29.51
NS004	2020-08-09	SWAB	SARS-CoV-2 Positive	COVID-19	29.21	29.18
NS005	2020-08-08	SWAB	SARS-CoV-2 Positive	COVID-19	20.95	20.9
NS007	2020-08-06	SWAB	SARS-CoV-2 Positive	COVID-19	29.29	28.28
NS008	2020-08-05	SWAB	SARS-CoV-2 Positive	COVID-19	35.05	37.56
NS009	2020-08-09	SWAB	SARS-CoV-2 Positive	COVID-19	28.91	28.15
NS010	2020-08-06	SWAB	SARS-CoV-2 Positive	COVID-19	21.19	19.53
NS011	2020-08-08	SWAB	SARS-CoV-2 Positive	COVID-19	22.26	24.57
NS012	2020-08-05	SWAB	SARS-CoV-2 Positive	COVID-19	34.46	35.63
NS013	2020-08-07	SWAB	SARS-CoV-2 Positive	COVID-19	27.68	28.52
NS014	2020-08-05	SWAB	SARS-CoV-2 Positive	COVID-19	21.57	23.24
NS015	2020-07-19	SWAB	Negative	CONTROL	-	-
NS016	2020-07-19	SWAB	Negative	CONTROL	-	-
NS017	2020-07-19	SWAB	Negative	CONTROL	-	-
NS018	2020-07-19	SWAB	Negative	CONTROL	-	-
NS019	2020-07-19	SWAB	Negative	CONTROL	-	-
NS020	2020-07-19	SWAB	Negative	CONTROL	-	-
NS021	2020-07-19	SWAB	Negative	CONTROL	-	-
NS023	2020-07-19	SWAB	Negative	CONTROL	-	-
